# Supplementary material for: Protonation of Verkade bases: a theoretical study
Source: Royal Society of Chemistry journal article supplement (doi:10.1039/c8nj04977g), 2018-12-31
Supplement: c8nj04977g1.pdf [file c8nj04977g1.pdf]

# Supporting Information of

## Protonation of Verkade Bases: A Theoretical Study

Sabnam S. Ullah, Shahnaz S. Rohman, Chayanika Kashyap and Ankur Kanti Guha\*

*Department of Chemistry, Cotton University, Panbazar, Guwahati, Assam, INDIA-781001*

*\*E-mail: [ankurkantiguha@gmail.com](mailto:ankurkantiguha@gmail.com)*

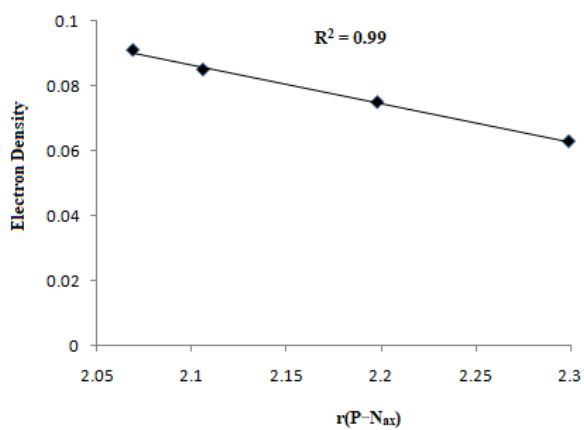

(a)

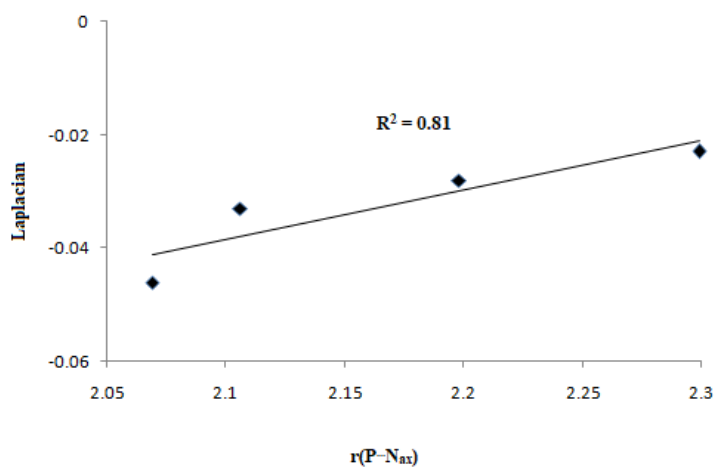

(b)

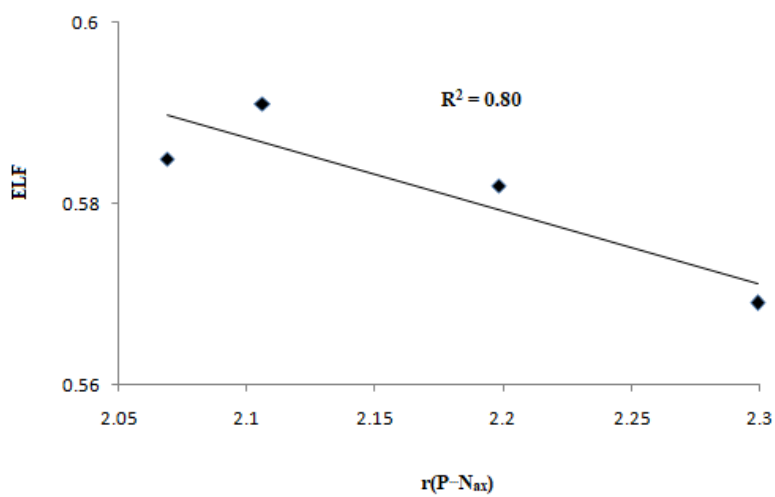

(c)

**Fig S1.** Variation of P...Nax distance (Å) against (a) electron density at the bond critical point (b) laplacian of electron density and (c) electron localization function.

Cartesian coordinates of the optimized geometries along with the energies in a.u.

1

Sum of electronic and zero-point Energies = -797.720390  
Sum of electronic and thermal Energies = -797.710177  
Sum of electronic and thermal Enthalpies = -797.709233  
Sum of electronic and thermal Free Energies = -797.754672

|    |           |           |           |
|----|-----------|-----------|-----------|
| 15 | 0.000000  | 0.000000  | 0.000000  |
| 7  | 0.000000  | 0.000000  | 1.725288  |
| 1  | 0.954027  | 0.000000  | 2.056401  |
| 7  | -0.956764 | -1.382606 | -0.386455 |
| 1  | -0.450971 | -1.962716 | -1.040110 |
| 7  | -1.047328 | 1.315883  | -0.387225 |
| 1  | -0.556815 | 1.962655  | -0.987873 |
| 6  | -0.857175 | -0.848953 | 2.551956  |
| 1  | -0.904364 | -1.867356 | 2.145743  |
| 1  | -0.419096 | -0.908366 | 3.552378  |
| 6  | -2.275691 | -0.292148 | 2.661627  |
| 1  | -2.869336 | -0.972349 | 3.292302  |
| 1  | -2.240924 | 0.675376  | 3.170978  |
| 6  | -1.888359 | 2.015148  | 0.584212  |
| 1  | -1.339477 | 2.191635  | 1.518010  |
| 1  | -2.158443 | 2.989122  | 0.166140  |
| 6  | -3.164505 | 1.235795  | 0.898963  |
| 1  | -3.767419 | 1.156042  | -0.010371 |
| 1  | -3.752509 | 1.810464  | 1.631610  |
| 6  | -2.385004 | -1.337999 | -0.698799 |
| 1  | -2.613558 | -0.488007 | -1.354022 |
| 1  | -2.647808 | -2.253973 | -1.235664 |
| 6  | -3.241551 | -1.236023 | 0.562188  |
| 1  | -4.300820 | -1.205850 | 0.262493  |
| 1  | -3.099679 | -2.138556 | 1.163631  |
| 7  | -2.911619 | -0.098135 | 1.382793  |

### 1-H<sup>+</sup> (P protonated)

Sum of electronic and zero-point Energies= -798.107697  
Sum of electronic and thermal Energies= -798.097524  
Sum of electronic and thermal Enthalpies= -798.096579  
Sum of electronic and thermal Free Energies= -798.142321

|    |              |              |              |
|----|--------------|--------------|--------------|
| 15 | -0.040817000 | -0.866803000 | -0.821829000 |
| 7  | 0.913179000  | -1.678533000 | 0.298792000  |
| 1  | 1.288399000  | -2.557603000 | -0.034980000 |
| 7  | -1.687148000 | -0.866095000 | -0.624910000 |
| 1  | -2.223402000 | -1.412719000 | -1.283225000 |
| 7  | 0.735284000  | 0.336707000  | -1.674502000 |

|   |              |              |              |
|---|--------------|--------------|--------------|
| 1 | 1.011177000  | 0.139105000  | -2.624995000 |
| 6 | 1.866734000  | -0.846201000 | 1.026951000  |
| 1 | 2.326289000  | -1.424386000 | 1.827293000  |
| 1 | 2.661219000  | -0.473747000 | 0.370484000  |
| 6 | 1.052990000  | 0.313070000  | 1.612900000  |
| 1 | 0.658191000  | 0.040957000  | 2.590294000  |
| 1 | 1.659786000  | 1.211416000  | 1.729307000  |
| 6 | 1.038654000  | 1.650342000  | -1.123791000 |
| 1 | 2.060339000  | 1.695164000  | -0.732757000 |
| 1 | 0.935123000  | 2.417398000  | -1.891273000 |
| 6 | 0.016889000  | 1.872289000  | -0.016733000 |
| 1 | -0.953924000 | 2.098301000  | -0.459631000 |
| 1 | 0.293099000  | 2.678412000  | 0.665675000  |
| 6 | -2.407006000 | 0.032035000  | 0.263298000  |
| 1 | -2.777623000 | 0.912974000  | -0.269537000 |
| 1 | -3.263260000 | -0.478725000 | 0.704336000  |
| 6 | -1.412568000 | 0.396422000  | 1.355914000  |
| 1 | -1.701967000 | 1.290012000  | 1.914024000  |
| 1 | -1.315235000 | -0.445134000 | 2.041245000  |
| 7 | -0.095599000 | 0.584530000  | 0.703244000  |
| 1 | -0.040126000 | -1.833386000 | -1.848425000 |

### 1-H<sup>+</sup> (N<sub>eq</sub> protonated)

|                                              |             |
|----------------------------------------------|-------------|
| Sum of electronic and zero-point Energies=   | -798.084533 |
| Sum of electronic and thermal Energies=      | -798.073882 |
| Sum of electronic and thermal Enthalpies=    | -798.072938 |
| Sum of electronic and thermal Free Energies= | -798.119639 |

|    |              |              |              |
|----|--------------|--------------|--------------|
| 15 | -0.617063000 | -1.593269000 | -0.155418000 |
| 7  | 0.679758000  | -1.241043000 | 1.331864000  |
| 1  | 0.970273000  | -2.170078000 | 1.640662000  |
| 7  | -1.833143000 | -0.572312000 | 0.358175000  |
| 1  | -2.666001000 | -1.118651000 | 0.542776000  |
| 7  | 0.243772000  | -1.048044000 | -1.471304000 |
| 1  | 0.417758000  | -1.841333000 | -2.078401000 |
| 6  | 1.886254000  | -0.395596000 | 1.094294000  |
| 1  | 2.589812000  | -0.531539000 | 1.917971000  |
| 1  | 2.351543000  | -0.767339000 | 0.182156000  |
| 6  | 1.454802000  | 1.072244000  | 0.979871000  |
| 1  | 1.241410000  | 1.455044000  | 1.981861000  |
| 1  | 2.297592000  | 1.657633000  | 0.592227000  |
| 6  | 0.956004000  | 0.153486000  | -1.944138000 |
| 1  | 2.030608000  | 0.020404000  | -1.786778000 |
| 1  | 0.798649000  | 0.238010000  | -3.020995000 |
| 6  | 0.476642000  | 1.426968000  | -1.259552000 |
| 1  | -0.471907000 | 1.736878000  | -1.698806000 |
| 1  | 1.200357000  | 2.229581000  | -1.456634000 |
| 6  | -2.111972000 | 0.859513000  | 0.182385000  |
| 1  | -2.294899000 | 1.078881000  | -0.873570000 |

|   |              |              |             |
|---|--------------|--------------|-------------|
| 1 | -3.030611000 | 1.090326000  | 0.723124000 |
| 6 | -0.963026000 | 1.700892000  | 0.721277000 |
| 1 | -1.142910000 | 2.761169000  | 0.497990000 |
| 1 | -0.920268000 | 1.594188000  | 1.807745000 |
| 7 | 0.278162000  | 1.205699000  | 0.156603000 |
| 1 | 0.112464000  | -0.849277000 | 2.087756000 |

### 1-H<sup>+</sup> (Nax protonated)

|                                              |             |
|----------------------------------------------|-------------|
| Sum of electronic and zero-point Energies=   | -798.067197 |
| Sum of electronic and thermal Energies=      | -798.056759 |
| Sum of electronic and thermal Enthalpies=    | -798.055815 |
| Sum of electronic and thermal Free Energies= | -798.101742 |

|    |              |              |              |
|----|--------------|--------------|--------------|
| 15 | 1.655971000  | 0.718394000  | -0.141713000 |
| 7  | 1.600763000  | -0.888808000 | -0.702595000 |
| 1  | 2.496269000  | -1.211726000 | -1.037746000 |
| 7  | 0.301332000  | 1.455322000  | -0.951052000 |
| 1  | 0.612451000  | 2.119305000  | -1.646491000 |
| 7  | 0.935451000  | 0.590422000  | 1.426671000  |
| 1  | 1.548897000  | 0.953665000  | 2.143497000  |
| 6  | 0.530440000  | -1.851514000 | -0.896157000 |
| 1  | 0.755492000  | -2.433327000 | -1.795153000 |
| 1  | 0.456987000  | -2.581252000 | -0.081526000 |
| 6  | -0.840492000 | -1.270741000 | -1.189529000 |
| 1  | -0.768930000 | -0.541589000 | -1.990744000 |
| 1  | -1.481785000 | -2.095999000 | -1.501607000 |
| 6  | 0.270991000  | -0.627587000 | 1.844589000  |
| 1  | 0.840248000  | -1.516428000 | 1.569472000  |
| 1  | 0.208131000  | -0.632580000 | 2.935942000  |
| 6  | -1.193192000 | -0.763619000 | 1.410608000  |
| 1  | -1.804471000 | -0.038316000 | 1.950181000  |
| 1  | -1.529619000 | -1.765572000 | 1.685422000  |
| 6  | -0.909869000 | 1.871763000  | -0.269146000 |
| 1  | -0.720284000 | 2.070846000  | 0.787898000  |
| 1  | -1.289240000 | 2.793670000  | -0.714505000 |
| 6  | -2.021889000 | 0.844801000  | -0.401655000 |
| 1  | -2.856562000 | 1.092107000  | 0.258241000  |
| 1  | -2.391100000 | 0.788491000  | -1.426797000 |
| 7  | -1.612115000 | -0.576477000 | -0.050043000 |
| 1  | -2.510003000 | -1.059008000 | -0.063510000 |

### TS (proton transfer from P to Neq in 1)

|                                              |             |
|----------------------------------------------|-------------|
| Sum of electronic and zero-point Energies=   | -797.998249 |
| Sum of electronic and thermal Energies=      | -797.987623 |
| Sum of electronic and thermal Enthalpies=    | -797.986679 |
| Sum of electronic and thermal Free Energies= | -798.034380 |

|    |              |              |              |
|----|--------------|--------------|--------------|
| 15 | -0.774405000 | -1.269541000 | -0.322359000 |
|----|--------------|--------------|--------------|

|   |              |              |              |
|---|--------------|--------------|--------------|
| 7 | -1.192587000 | -0.141101000 | -1.541627000 |
| 7 | 0.796235000  | -1.777374000 | -0.450070000 |
| 7 | -1.345676000 | -0.740252000 | 1.190775000  |
| 6 | -1.057689000 | 1.370781000  | -1.349132000 |
| 1 | -1.223190000 | 1.812954000  | -2.328291000 |
| 1 | -1.840945000 | 1.730853000  | -0.676821000 |
| 6 | 0.285912000  | 1.882628000  | -0.844246000 |
| 1 | 1.006260000  | 1.919562000  | -1.660584000 |
| 1 | 0.176546000  | 2.926042000  | -0.500389000 |
| 6 | -1.034752000 | 0.533333000  | 1.847057000  |
| 1 | -1.810424000 | 1.240232000  | 1.539064000  |
| 1 | -1.110712000 | 0.375916000  | 2.929880000  |
| 6 | 0.360598000  | 1.135869000  | 1.551113000  |
| 1 | 1.146257000  | 0.736518000  | 2.200535000  |
| 1 | 0.259815000  | 2.191750000  | 1.843260000  |
| 6 | 2.053549000  | -1.089589000 | -0.006293000 |
| 1 | 2.214576000  | -1.337829000 | 1.050521000  |
| 1 | 2.881042000  | -1.503819000 | -0.587009000 |
| 6 | 2.099060000  | 0.423786000  | -0.134548000 |
| 1 | 2.911538000  | 0.791181000  | 0.514529000  |
| 1 | 2.367361000  | 0.721843000  | -1.148600000 |
| 7 | 0.791486000  | 0.982336000  | 0.164815000  |
| 1 | -2.351565000 | -0.970207000 | 1.239845000  |
| 1 | 0.870656000  | -2.774230000 | -0.179769000 |
| 1 | -2.174598000 | -0.234466000 | -1.824667000 |
| 1 | -1.292810000 | -2.389294000 | 0.492908000  |

2

|                                              |             |
|----------------------------------------------|-------------|
| Sum of electronic and zero-point Energies=   | -915.500006 |
| Sum of electronic and thermal Energies=      | -915.484864 |
| Sum of electronic and thermal Enthalpies=    | -915.483920 |
| Sum of electronic and thermal Free Energies= | -915.541427 |

|    |              |              |              |
|----|--------------|--------------|--------------|
| 15 | 0.607001000  | 0.935388000  | 0.605325000  |
| 7  | -0.510646000 | -0.029385000 | 1.524169000  |
| 7  | 1.794853000  | -0.211561000 | 0.157208000  |
| 7  | -0.254696000 | 1.455190000  | -0.796758000 |
| 6  | -1.878184000 | -0.203396000 | 1.059492000  |
| 1  | -2.515567000 | -0.414375000 | 1.923094000  |
| 1  | -2.270266000 | 0.714930000  | 0.602808000  |
| 6  | -1.956189000 | -1.391269000 | 0.074034000  |
| 1  | -2.042805000 | -2.316890000 | 0.650842000  |
| 1  | -2.865468000 | -1.315371000 | -0.535492000 |
| 6  | -1.067941000 | 0.754336000  | -1.785250000 |
| 1  | -2.135935000 | 0.863349000  | -1.538637000 |
| 1  | -0.931914000 | 1.257227000  | -2.751999000 |
| 6  | -0.754505000 | -0.724210000 | -1.988668000 |
| 1  | 0.236902000  | -0.821048000 | -2.432765000 |
| 1  | -1.471605000 | -1.096486000 | -2.738557000 |

|   |              |              |              |
|---|--------------|--------------|--------------|
| 6 | 1.679793000  | -1.519263000 | -0.472288000 |
| 1 | 1.933327000  | -1.435453000 | -1.540993000 |
| 1 | 2.449782000  | -2.172119000 | -0.040421000 |
| 6 | 0.347812000  | -2.238586000 | -0.312420000 |
| 1 | 0.454892000  | -3.204808000 | -0.833209000 |
| 1 | 0.194382000  | -2.450032000 | 0.746112000  |
| 7 | -0.805653000 | -1.504496000 | -0.782729000 |
| 6 | -0.599330000 | 2.873854000  | -0.784424000 |
| 1 | -1.651075000 | 3.036898000  | -0.505906000 |
| 1 | 0.030778000  | 3.408283000  | -0.073707000 |
| 1 | -0.445655000 | 3.306478000  | -1.779200000 |
| 6 | -0.365108000 | 0.148824000  | 2.964133000  |
| 1 | -0.851856000 | 1.061322000  | 3.338786000  |
| 1 | -0.790991000 | -0.711982000 | 3.487199000  |
| 1 | 0.694126000  | 0.199567000  | 3.222551000  |
| 6 | 3.092262000  | 0.381313000  | -0.144332000 |
| 1 | 3.210656000  | 1.319594000  | 0.398628000  |
| 1 | 3.890868000  | -0.301266000 | 0.164359000  |
| 1 | 3.213723000  | 0.583504000  | -1.218259000 |

## 2-H<sup>+</sup> (P protonated)

|                                              |             |
|----------------------------------------------|-------------|
| Sum of electronic and zero-point Energies=   | -915.911176 |
| Sum of electronic and thermal Energies=      | -915.896365 |
| Sum of electronic and thermal Enthalpies=    | -915.895421 |
| Sum of electronic and thermal Free Energies= | -915.952014 |

|    |              |              |              |
|----|--------------|--------------|--------------|
| 15 | 0.003444000  | -0.708295000 | 0.060041000  |
| 7  | -0.941316000 | -0.623516000 | -1.345046000 |
| 7  | 1.664554000  | -0.785191000 | -0.088871000 |
| 7  | -0.736416000 | -0.212626000 | 1.486098000  |
| 6  | -1.796204000 | 0.554639000  | -1.387302000 |
| 1  | -2.255053000 | 0.636556000  | -2.373355000 |
| 1  | -2.605630000 | 0.488136000  | -0.645621000 |
| 6  | -0.898365000 | 1.766794000  | -1.121947000 |
| 1  | -0.506737000 | 2.163983000  | -2.057005000 |
| 1  | -1.437126000 | 2.566228000  | -0.613384000 |
| 6  | -0.843926000 | 1.194908000  | 1.831954000  |
| 1  | -1.837466000 | 1.589559000  | 1.579127000  |
| 1  | -0.700679000 | 1.326732000  | 2.907403000  |
| 6  | 0.253474000  | 1.912928000  | 1.064667000  |
| 1  | 1.219873000  | 1.705510000  | 1.525810000  |
| 1  | 0.107076000  | 2.993535000  | 1.014553000  |
| 6  | 2.470721000  | 0.394232000  | -0.350832000 |
| 1  | 2.940006000  | 0.759122000  | 0.571619000  |
| 1  | 3.274830000  | 0.144953000  | -1.047534000 |
| 6  | 1.550850000  | 1.424554000  | -0.981992000 |
| 1  | 1.942923000  | 2.442425000  | -0.919008000 |
| 1  | 1.380056000  | 1.163663000  | -2.026104000 |
| 7  | 0.250019000  | 1.316426000  | -0.287621000 |

|   |              |              |              |
|---|--------------|--------------|--------------|
| 1 | -0.147406000 | -2.087755000 | 0.301079000  |
| 6 | -1.595521000 | -1.855115000 | -1.792232000 |
| 1 | -1.934884000 | -1.717988000 | -2.819431000 |
| 1 | -0.883592000 | -2.679778000 | -1.786502000 |
| 1 | -2.458644000 | -2.120243000 | -1.168813000 |
| 6 | 2.427535000  | -1.938646000 | 0.385411000  |
| 1 | 2.952301000  | -1.700452000 | 1.315487000  |
| 1 | 1.771523000  | -2.788534000 | 0.566168000  |
| 1 | 3.160089000  | -2.228525000 | -0.370621000 |
| 6 | -1.603613000 | -1.102789000 | 2.254842000  |
| 1 | -1.364665000 | -1.026032000 | 3.317879000  |
| 1 | -2.657650000 | -0.843219000 | 2.111450000  |
| 1 | -1.458391000 | -2.138145000 | 1.948872000  |

## 2-H<sup>+</sup> (N<sub>eq</sub> protonated)

|                                              |             |
|----------------------------------------------|-------------|
| Sum of electronic and zero-point Energies=   | -915.891466 |
| Sum of electronic and thermal Energies=      | -915.875891 |
| Sum of electronic and thermal Enthalpies=    | -915.874946 |
| Sum of electronic and thermal Free Energies= | -915.933458 |

|    |              |              |              |
|----|--------------|--------------|--------------|
| 15 | 0.272411000  | -0.901146000 | 0.985639000  |
| 7  | -1.281277000 | -1.227391000 | 0.512790000  |
| 7  | 1.416126000  | -0.847843000 | -0.957757000 |
| 7  | 0.388954000  | 0.660613000  | 1.510974000  |
| 6  | -2.366339000 | -0.353181000 | 0.035569000  |
| 1  | -3.223213000 | -0.991435000 | -0.186880000 |
| 1  | -2.689402000 | 0.314625000  | 0.830758000  |
| 6  | -1.977316000 | 0.426025000  | -1.225732000 |
| 1  | -1.899247000 | -0.275369000 | -2.059740000 |
| 1  | -2.787658000 | 1.130826000  | -1.463905000 |
| 6  | -0.531478000 | 1.786395000  | 1.316720000  |
| 1  | -1.502782000 | 1.538685000  | 1.739105000  |
| 1  | -0.152496000 | 2.624668000  | 1.904093000  |
| 6  | -0.637670000 | 2.210158000  | -0.160141000 |
| 1  | 0.247979000  | 2.797556000  | -0.415052000 |
| 1  | -1.506658000 | 2.872937000  | -0.276414000 |
| 6  | 1.612709000  | 0.481155000  | -1.561437000 |
| 1  | 2.003186000  | 1.139017000  | -0.777595000 |
| 1  | 2.362756000  | 0.430323000  | -2.358463000 |
| 6  | 0.293679000  | 1.019768000  | -2.103512000 |
| 1  | 0.471853000  | 1.998251000  | -2.566695000 |
| 1  | -0.062673000 | 0.360300000  | -2.899876000 |
| 7  | -0.701756000 | 1.078100000  | -1.055946000 |
| 1  | 0.869367000  | -1.424564000 | -1.597775000 |
| 6  | -1.555087000 | -2.663271000 | 0.310863000  |
| 1  | -1.738606000 | -2.874423000 | -0.746540000 |
| 1  | -0.710199000 | -3.265216000 | 0.648648000  |
| 1  | -2.432139000 | -2.955311000 | 0.890249000  |
| 6  | 2.688530000  | -1.526314000 | -0.657681000 |



|   |             |              |              |
|---|-------------|--------------|--------------|
| 1 | 3.252594000 | -0.913574000 | 0.048250000  |
| 1 | 2.489670000 | -2.492226000 | -0.193818000 |
| 1 | 3.289205000 | -1.668321000 | -1.558576000 |
| 6 | 1.639616000 | 0.998800000  | 2.211713000  |
| 1 | 1.413982000 | 1.383619000  | 3.207740000  |
| 1 | 2.263678000 | 0.110770000  | 2.324399000  |
| 1 | 2.200451000 | 1.754484000  | 1.654902000  |

## 2-H<sup>+</sup> (N<sub>ax</sub> protonated)

|                                              |             |
|----------------------------------------------|-------------|
| Sum of electronic and zero-point Energies=   | -915.866043 |
| Sum of electronic and thermal Energies=      | -915.850988 |
| Sum of electronic and thermal Enthalpies=    | -915.850044 |
| Sum of electronic and thermal Free Energies= | -915.906682 |

|    |              |              |              |
|----|--------------|--------------|--------------|
| 15 | 1.021337000  | 0.201869000  | 0.985659000  |
| 7  | 1.204640000  | 1.195898000  | -0.405059000 |
| 7  | -0.639221000 | 0.471431000  | 1.370596000  |
| 7  | 0.853790000  | -1.416231000 | 0.377739000  |
| 6  | 0.356007000  | 1.362696000  | -1.569477000 |
| 1  | 0.435266000  | 2.412865000  | -1.882488000 |
| 1  | 0.711570000  | 0.783241000  | -2.433974000 |
| 6  | -1.138582000 | 1.170631000  | -1.401878000 |
| 1  | -1.504079000 | 1.760365000  | -0.566666000 |
| 1  | -1.604476000 | 1.538902000  | -2.317536000 |
| 6  | 0.608913000  | -1.595018000 | -1.038821000 |
| 1  | 1.273654000  | -0.977841000 | -1.649165000 |
| 1  | 0.852249000  | -2.631136000 | -1.296796000 |
| 6  | -0.842990000 | -1.472761000 | -1.521030000 |
| 1  | -1.427781000 | -2.306153000 | -1.127975000 |
| 1  | -0.829950000 | -1.552400000 | -2.610236000 |
| 6  | -1.669540000 | -0.530490000 | 1.297391000  |
| 1  | -1.221542000 | -1.524641000 | 1.309995000  |
| 1  | -2.334401000 | -0.455250000 | 2.164636000  |
| 6  | -2.532166000 | -0.381778000 | 0.051433000  |
| 1  | -3.178765000 | -1.250830000 | -0.089393000 |
| 1  | -3.157537000 | 0.512145000  | 0.087068000  |
| 7  | -1.705055000 | -0.246968000 | -1.214268000 |
| 6  | 2.563798000  | 1.671089000  | -0.672527000 |
| 1  | 3.167220000  | 1.585050000  | 0.231044000  |
| 1  | 3.050569000  | 1.094469000  | -1.469078000 |
| 1  | 2.541381000  | 2.722718000  | -0.972654000 |
| 6  | 1.831226000  | -2.372834000 | 0.919495000  |
| 1  | 1.429664000  | -3.386046000 | 0.849710000  |
| 1  | 2.791352000  | -2.335282000 | 0.390960000  |
| 1  | 2.010690000  | -2.153286000 | 1.971297000  |
| 6  | -0.969751000 | 1.699786000  | 2.078945000  |
| 1  | -1.726859000 | 2.293374000  | 1.549413000  |
| 1  | -1.345102000 | 1.489078000  | 3.085289000  |
| 1  | -0.078673000 | 2.323476000  | 2.170902000  |

1 -2.415079000 -0.307704000 -1.943499000

**TS (proton transfer from P to N<sub>eq</sub> in 2)**

Sum of electronic and zero-point Energies= -915.771915  
Sum of electronic and thermal Energies= -915.759167  
Sum of electronic and thermal Enthalpies= -915.758223  
Sum of electronic and thermal Free Energies= -915.809933

15 0.352852000 0.974705000 -0.312063000  
7 1.032966000 -0.177817000 -1.381644000  
7 -1.246717000 1.258837000 -0.631066000  
7 0.824306000 0.642345000 1.288980000  
6 1.067554000 -1.675193000 -1.069064000  
1 1.388022000 -2.164710000 -1.985215000  
1 1.814957000 -1.876178000 -0.296965000  
6 -0.247378000 -2.320607000 -0.648879000  
1 -0.868356000 -2.514590000 -1.522624000  
1 -0.045759000 -3.311149000 -0.204934000  
6 0.607176000 -0.607581000 2.023786000  
1 1.492532000 -1.226867000 1.853901000  
1 0.549515000 -0.359615000 3.090672000  
6 -0.663938000 -1.410366000 1.653058000  
1 -1.556597000 -1.070382000 2.187904000  
1 -0.463840000 -2.418298000 2.046029000  
6 -2.448271000 0.446332000 -0.247755000  
1 -2.748343000 0.750688000 0.763053000  
1 -3.255616000 0.701944000 -0.937986000  
6 -2.291805000 -1.065070000 -0.244726000  
1 -3.115652000 -1.486415000 0.355396000  
1 -2.413648000 -1.472272000 -1.248950000  
7 -0.963439000 -1.421115000 0.224337000  
1 0.640174000 2.211976000 0.445472000  
6 2.188810000 1.160641000 1.463331000  
1 2.711692000 1.238710000 0.503327000  
1 2.181794000 2.158068000 1.917421000  
1 2.784097000 0.507206000 2.111224000  
6 -1.566801000 2.672519000 -0.386218000  
1 -0.708133000 3.209251000 0.032968000  
1 -1.854767000 3.182660000 -1.312468000  
1 -2.398156000 2.776844000 0.320234000  
6 2.446686000 0.109835000 -1.663698000  
1 2.652005000 0.084580000 -2.739948000  
1 2.733057000 1.101841000 -1.296243000  
1 3.106224000 -0.622675000 -1.184587000

**3**

Sum of electronic and zero-point Energies= -857.383754  
Sum of electronic and thermal Energies= -857.373910

Sum of electronic and thermal Enthalpies= -857.372966  
Sum of electronic and thermal Free Energies= -857.418507

|    |              |              |              |
|----|--------------|--------------|--------------|
| 15 | 1.627430000  | 0.520793000  | -0.112437000 |
| 8  | 1.384379000  | -0.955391000 | -0.776440000 |
| 8  | 0.536221000  | 1.514334000  | -0.857695000 |
| 8  | 0.934416000  | 0.400214000  | 1.388692000  |
| 6  | 0.318410000  | -1.885487000 | -0.951728000 |
| 1  | 0.548296000  | -2.440255000 | -1.864307000 |
| 1  | 0.344988000  | -2.599144000 | -0.124492000 |
| 6  | -1.075313000 | -1.281478000 | -1.090639000 |
| 1  | -1.143059000 | -0.775663000 | -2.054620000 |
| 1  | -1.772141000 | -2.136708000 | -1.117630000 |
| 6  | 0.149475000  | -0.684821000 | 1.860173000  |
| 1  | 0.652740000  | -1.623343000 | 1.619969000  |
| 1  | 0.126289000  | -0.597142000 | 2.948405000  |
| 6  | -1.297072000 | -0.662329000 | 1.322025000  |
| 1  | -1.866611000 | 0.076135000  | 1.893952000  |
| 1  | -1.745208000 | -1.644793000 | 1.533924000  |
| 6  | -0.654376000 | 2.010213000  | -0.259910000 |
| 1  | -0.483288000 | 2.202761000  | 0.802463000  |
| 1  | -0.885416000 | 2.955799000  | -0.754575000 |
| 6  | -1.795450000 | 1.015889000  | -0.443544000 |
| 1  | -2.660806000 | 1.359395000  | 0.139068000  |
| 1  | -2.098671000 | 1.009773000  | -1.492667000 |
| 7  | -1.448964000 | -0.334840000 | -0.071093000 |

### 3-H<sup>+</sup> (P protonated)

Sum of electronic and zero-point Energies= -857.751551  
Sum of electronic and thermal Energies= -857.742136  
Sum of electronic and thermal Enthalpies= -857.741191  
Sum of electronic and thermal Free Energies= -857.786029

|    |              |              |              |
|----|--------------|--------------|--------------|
| 15 | -0.029397000 | -1.210409000 | -0.203254000 |
| 8  | 1.021766000  | -1.237846000 | 0.995538000  |
| 8  | -1.592847000 | -1.126747000 | 0.072959000  |
| 8  | 0.543196000  | -0.690721000 | -1.596240000 |
| 6  | 1.889687000  | -0.125045000 | 1.225965000  |
| 1  | 2.351338000  | -0.284012000 | 2.196994000  |
| 1  | 2.666903000  | -0.130266000 | 0.459269000  |
| 6  | 1.048425000  | 1.159244000  | 1.197936000  |
| 1  | 0.669261000  | 1.381121000  | 2.193798000  |
| 1  | 1.645680000  | 2.009843000  | 0.865815000  |
| 6  | 0.928555000  | 0.665173000  | -1.858692000 |
| 1  | 1.982692000  | 0.781371000  | -1.599773000 |
| 1  | 0.804815000  | 0.828534000  | -2.926664000 |
| 6  | 0.025675000  | 1.569153000  | -1.031966000 |
| 1  | -0.964905000 | 1.607924000  | -1.487308000 |
| 1  | 0.416153000  | 2.586188000  | -0.958877000 |

|   |              |              |              |
|---|--------------|--------------|--------------|
| 6 | -2.336918000 | 0.084254000  | 0.234696000  |
| 1 | -2.678752000 | 0.407258000  | -0.750187000 |
| 1 | -3.202119000 | -0.153299000 | 0.849233000  |
| 6 | -1.422441000 | 1.091433000  | 0.913570000  |
| 1 | -1.796249000 | 2.113870000  | 0.822198000  |
| 1 | -1.331142000 | 0.837256000  | 1.969353000  |
| 7 | -0.095332000 | 0.930414000  | 0.290365000  |
| 1 | -0.030217000 | -2.565322000 | -0.484720000 |

### 3-H<sup>+</sup> (N<sub>eq</sub> protonated)

|                                              |             |
|----------------------------------------------|-------------|
| Sum of electronic and zero-point Energies=   | -857.707313 |
| Sum of electronic and thermal Energies=      | -857.696562 |
| Sum of electronic and thermal Enthalpies=    | -857.695617 |
| Sum of electronic and thermal Free Energies= | -857.742935 |

|    |              |              |              |
|----|--------------|--------------|--------------|
| 15 | -1.340545000 | -1.127658000 | 0.132002000  |
| 8  | 0.019988000  | -1.663668000 | 0.700168000  |
| 8  | -1.727737000 | 0.306190000  | 0.650467000  |
| 8  | -0.597963000 | -0.425757000 | -1.673085000 |
| 6  | 1.383159000  | -1.358216000 | 1.079115000  |
| 1  | 1.553874000  | -1.877748000 | 2.020892000  |
| 1  | 2.008145000  | -1.821619000 | 0.316015000  |
| 6  | 1.635863000  | 0.143164000  | 1.215651000  |
| 1  | 1.311459000  | 0.466202000  | 2.204419000  |
| 1  | 2.722462000  | 0.300080000  | 1.160734000  |
| 6  | 0.837766000  | -0.300371000 | -1.927051000 |
| 1  | 1.308180000  | -1.238519000 | -1.633217000 |
| 1  | 0.970312000  | -0.154743000 | -2.999704000 |
| 6  | 1.358464000  | 0.903065000  | -1.141923000 |
| 1  | 1.005746000  | 1.814697000  | -1.630547000 |
| 1  | 2.454590000  | 0.898732000  | -1.216611000 |
| 6  | -1.401557000 | 1.668994000  | 0.288908000  |
| 1  | -1.563728000 | 1.763830000  | -0.785959000 |
| 1  | -2.117912000 | 2.293177000  | 0.819355000  |
| 6  | 0.036361000  | 1.974246000  | 0.674009000  |
| 1  | 0.315058000  | 2.946972000  | 0.251426000  |
| 1  | 0.106744000  | 2.062210000  | 1.758280000  |
| 7  | 0.917297000  | 0.913889000  | 0.231365000  |
| 1  | -1.042475000 | -0.855042000 | -2.417329000 |

### 3-H<sup>+</sup> (N<sub>ax</sub> protonated)

|                                              |             |
|----------------------------------------------|-------------|
| Sum of electronic and zero-point Energies=   | -857.720091 |
| Sum of electronic and thermal Energies=      | -857.710274 |
| Sum of electronic and thermal Enthalpies=    | -857.709330 |
| Sum of electronic and thermal Free Energies= | -857.754631 |

|    |              |             |              |
|----|--------------|-------------|--------------|
| 15 | -1.640192000 | 0.754736000 | 0.009575000  |
| 8  | -0.456523000 | 0.986749000 | -1.154089000 |

|   |              |              |              |
|---|--------------|--------------|--------------|
| 8 | -1.874228000 | -0.816266000 | -0.349641000 |
| 8 | -0.742974000 | 0.618847000  | 1.392187000  |
| 6 | 0.781167000  | 1.616726000  | -0.968064000 |
| 1 | 0.980440000  | 2.258360000  | -1.828638000 |
| 1 | 0.790428000  | 2.254855000  | -0.084399000 |
| 6 | 1.874730000  | 0.547219000  | -0.937343000 |
| 1 | 2.100949000  | 0.223630000  | -1.954142000 |
| 1 | 2.792213000  | 0.925888000  | -0.480467000 |
| 6 | 0.588499000  | 0.536621000  | 1.846673000  |
| 1 | 1.104336000  | 1.485995000  | 1.697584000  |
| 1 | 0.533165000  | 0.378151000  | 2.926107000  |
| 6 | 1.428857000  | -0.611897000 | 1.304972000  |
| 1 | 1.084278000  | -1.577146000 | 1.672339000  |
| 1 | 2.450546000  | -0.462278000 | 1.662947000  |
| 6 | -0.903246000 | -1.818402000 | -0.160657000 |
| 1 | -0.780849000 | -2.014891000 | 0.907702000  |
| 1 | -1.323105000 | -2.720921000 | -0.607787000 |
| 6 | 0.440037000  | -1.623495000 | -0.861725000 |
| 1 | 0.906569000  | -2.609511000 | -0.905454000 |
| 1 | 0.295464000  | -1.246823000 | -1.871504000 |
| 7 | 1.519144000  | -0.731820000 | -0.199300000 |
| 1 | 2.363965000  | -1.288891000 | -0.333595000 |

4

|                                              |              |
|----------------------------------------------|--------------|
| Sum of electronic and zero-point Energies=   | -1826.292604 |
| Sum of electronic and thermal Energies=      | -1826.281099 |
| Sum of electronic and thermal Enthalpies=    | -1826.280155 |
| Sum of electronic and thermal Free Energies= | -1826.329768 |

|    |              |              |              |
|----|--------------|--------------|--------------|
| 15 | 0.242983000  | -1.666646000 | -0.167578000 |
| 16 | -1.640953000 | -1.153359000 | -1.031482000 |
| 16 | 1.897828000  | -0.645551000 | -1.098925000 |
| 16 | 0.252307000  | -1.024859000 | 1.879306000  |
| 6  | -2.198161000 | 0.598612000  | -0.945865000 |
| 1  | -2.875785000 | 0.680245000  | -1.798188000 |
| 1  | -2.791615000 | 0.746029000  | -0.044162000 |
| 6  | -1.105804000 | 1.646832000  | -1.073646000 |
| 1  | -0.623766000 | 1.527213000  | -2.045490000 |
| 1  | -1.590753000 | 2.640366000  | -1.051285000 |
| 6  | -0.950545000 | 0.338998000  | 1.989486000  |
| 1  | -1.900464000 | -0.034785000 | 1.612207000  |
| 1  | -1.069862000 | 0.501171000  | 3.063686000  |
| 6  | -0.512210000 | 1.648326000  | 1.321373000  |
| 1  | 0.324500000  | 2.053145000  | 1.897036000  |
| 1  | -1.341051000 | 2.370821000  | 1.407567000  |
| 6  | 2.257137000  | 0.856788000  | -0.134149000 |
| 1  | 2.294804000  | 0.587061000  | 0.923519000  |
| 1  | 3.258772000  | 1.158407000  | -0.448516000 |
| 6  | 1.241188000  | 1.961283000  | -0.383513000 |

|   |              |             |              |
|---|--------------|-------------|--------------|
| 1 | 1.519388000  | 2.852885000 | 0.198092000  |
| 1 | 1.273076000  | 2.242080000 | -1.438027000 |
| 7 | -0.094077000 | 1.507186000 | -0.055323000 |

#### 4-H<sup>+</sup> (P protonated)

|                                              |              |
|----------------------------------------------|--------------|
| Sum of electronic and zero-point Energies=   | -1826.648328 |
| Sum of electronic and thermal Energies=      | -1826.637311 |
| Sum of electronic and thermal Enthalpies=    | -1826.636367 |
| Sum of electronic and thermal Free Energies= | -1826.684852 |

|    |              |              |              |
|----|--------------|--------------|--------------|
| 15 | -0.098504000 | -0.362011000 | -1.062618000 |
| 16 | 1.010731000  | -2.021742000 | -0.408569000 |
| 16 | -2.182118000 | -0.326674000 | -0.915310000 |
| 16 | 1.000959000  | 1.373375000  | -1.462615000 |
| 6  | 2.004806000  | -1.101804000 | 0.807695000  |
| 1  | 2.621730000  | -1.842903000 | 1.315694000  |
| 1  | 2.663287000  | -0.418727000 | 0.270563000  |
| 6  | 1.094284000  | -0.398406000 | 1.813023000  |
| 1  | 0.709395000  | -1.134919000 | 2.517793000  |
| 1  | 1.666461000  | 0.337562000  | 2.383937000  |
| 6  | 1.214153000  | 2.116728000  | 0.191451000  |
| 1  | 2.183758000  | 1.827527000  | 0.595712000  |
| 1  | 1.215727000  | 3.194624000  | 0.031730000  |
| 6  | 0.066367000  | 1.725899000  | 1.107927000  |
| 1  | -0.860005000 | 2.143426000  | 0.712929000  |
| 1  | 0.228685000  | 2.128224000  | 2.113821000  |
| 6  | -2.502780000 | 0.179305000  | 0.805116000  |
| 1  | -2.735994000 | 1.242439000  | 0.826792000  |
| 1  | -3.391688000 | -0.369175000 | 1.115975000  |
| 6  | -1.338415000 | -0.204535000 | 1.699692000  |
| 1  | -1.489338000 | 0.198987000  | 2.707656000  |
| 1  | -1.282964000 | -1.292559000 | 1.764080000  |
| 7  | -0.054096000 | 0.262015000  | 1.149179000  |
| 1  | -0.176445000 | -0.720922000 | -2.427184000 |

#### 4-H<sup>+</sup> (N<sub>eq</sub> protonated)

|                                              |              |
|----------------------------------------------|--------------|
| Sum of electronic and zero-point Energies=   | -1826.617767 |
| Sum of electronic and thermal Energies=      | -1826.605603 |
| Sum of electronic and thermal Enthalpies=    | -1826.604659 |
| Sum of electronic and thermal Free Energies= | -1826.656005 |

|    |              |              |              |
|----|--------------|--------------|--------------|
| 15 | -0.199650000 | -1.726514000 | -0.016376000 |
| 16 | -1.624249000 | -0.931353000 | -1.295978000 |
| 16 | 2.050083000  | -0.952389000 | -0.807016000 |
| 16 | -0.219949000 | -0.985328000 | 1.921943000  |
| 6  | -2.027080000 | 0.855140000  | -1.130009000 |
| 1  | -2.631318000 | 1.028756000  | -2.023153000 |
| 1  | -2.670554000 | 1.012190000  | -0.269131000 |

|   |              |              |              |
|---|--------------|--------------|--------------|
| 6 | -0.807178000 | 1.763760000  | -1.147889000 |
| 1 | -0.303398000 | 1.645283000  | -2.108898000 |
| 1 | -1.162456000 | 2.804169000  | -1.084155000 |
| 6 | -1.094272000 | 0.614312000  | 1.940617000  |
| 1 | -2.092418000 | 0.451263000  | 1.543725000  |
| 1 | -1.202633000 | 0.832106000  | 3.005442000  |
| 6 | -0.320814000 | 1.745741000  | 1.258517000  |
| 1 | 0.551918000  | 1.969985000  | 1.875687000  |
| 1 | -0.956408000 | 2.643359000  | 1.264979000  |
| 6 | 2.436360000  | 0.604462000  | 0.063603000  |
| 1 | 2.330915000  | 0.357935000  | 1.124006000  |
| 1 | 3.485783000  | 0.823265000  | -0.136905000 |
| 6 | 1.522612000  | 1.752385000  | -0.350143000 |
| 1 | 1.851356000  | 2.655559000  | 0.180189000  |
| 1 | 1.659329000  | 1.952307000  | -1.415226000 |
| 7 | 0.129750000  | 1.434502000  | -0.090218000 |
| 1 | 1.674459000  | -0.429658000 | -1.990753000 |

#### 4-H<sup>+</sup> (Nax protonated)

|                                              |              |
|----------------------------------------------|--------------|
| Sum of electronic and zero-point Energies=   | -1826.619387 |
| Sum of electronic and thermal Energies=      | -1826.607946 |
| Sum of electronic and thermal Enthalpies=    | -1826.607002 |
| Sum of electronic and thermal Free Energies= | -1826.656090 |

|    |              |              |              |
|----|--------------|--------------|--------------|
| 15 | -1.473286000 | -1.046843000 | -0.152373000 |
| 16 | -1.942178000 | 0.906938000  | -0.850771000 |
| 16 | 0.263847000  | -1.788356000 | -1.224769000 |
| 16 | -0.766212000 | -0.819780000 | 1.852816000  |
| 6  | -0.529860000 | 2.085072000  | -0.914828000 |
| 1  | -0.798998000 | 2.704303000  | -1.772947000 |
| 1  | -0.522397000 | 2.747542000  | -0.049662000 |
| 6  | 0.838660000  | 1.522346000  | -1.226755000 |
| 1  | 0.757445000  | 0.672412000  | -1.899123000 |
| 1  | 1.429674000  | 2.294977000  | -1.721303000 |
| 6  | -0.144843000 | 0.880604000  | 1.908314000  |
| 1  | -0.912819000 | 1.537504000  | 1.511827000  |
| 1  | -0.094275000 | 1.093843000  | 2.980555000  |
| 6  | 1.258866000  | 1.221116000  | 1.416586000  |
| 1  | 1.995939000  | 0.645303000  | 1.978930000  |
| 1  | 1.418308000  | 2.277315000  | 1.647160000  |
| 6  | 1.701353000  | -1.504090000 | -0.151699000 |
| 1  | 1.417912000  | -1.651212000 | 0.891426000  |
| 1  | 2.393905000  | -2.308877000 | -0.409647000 |
| 6  | 2.462483000  | -0.212305000 | -0.346645000 |
| 1  | 3.333536000  | -0.206666000 | 0.313715000  |
| 1  | 2.811823000  | -0.107859000 | -1.375431000 |
| 7  | 1.713027000  | 1.073080000  | -0.042163000 |
| 1  | 2.470784000  | 1.755211000  | -0.061029000 |
